# Supplementary material for: VE-PTP maintains the endothelial barrier via plakoglobin and becomes dissociated from VE-cadherin by leukocytes and by VEGF
Source: PubMed Central journal article supplement — J Exp Med. 2008 Nov 24;205(12):2929–45. doi: 10.1084/jem.20080406 (PMC2585844; doi:10.1084/jem.20080406), 2008-11-24
Supplement: jem.20080406_1.pdf [file jem.20080406_1.pdf]

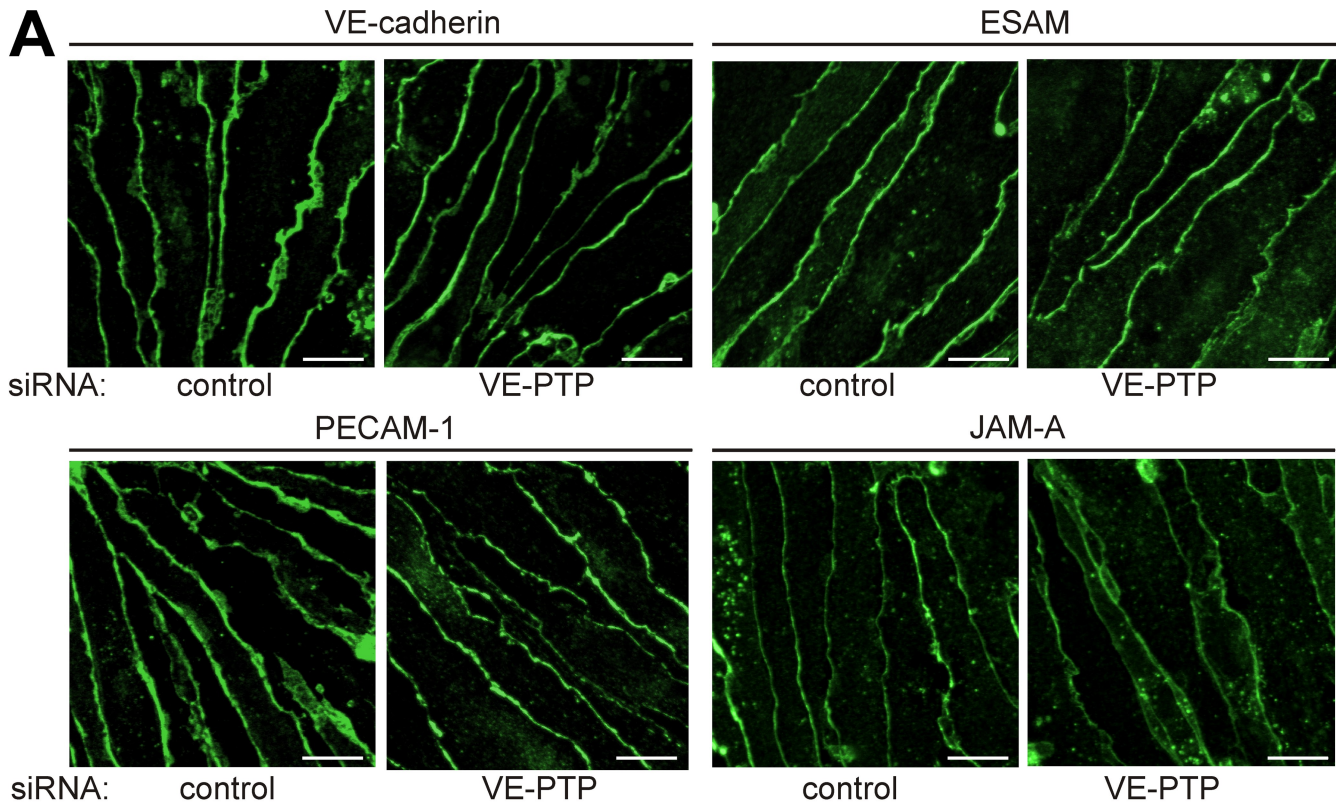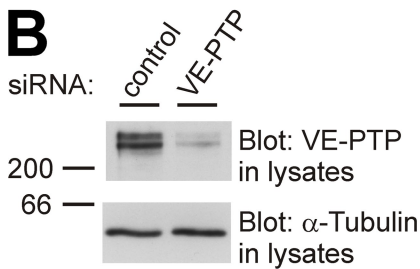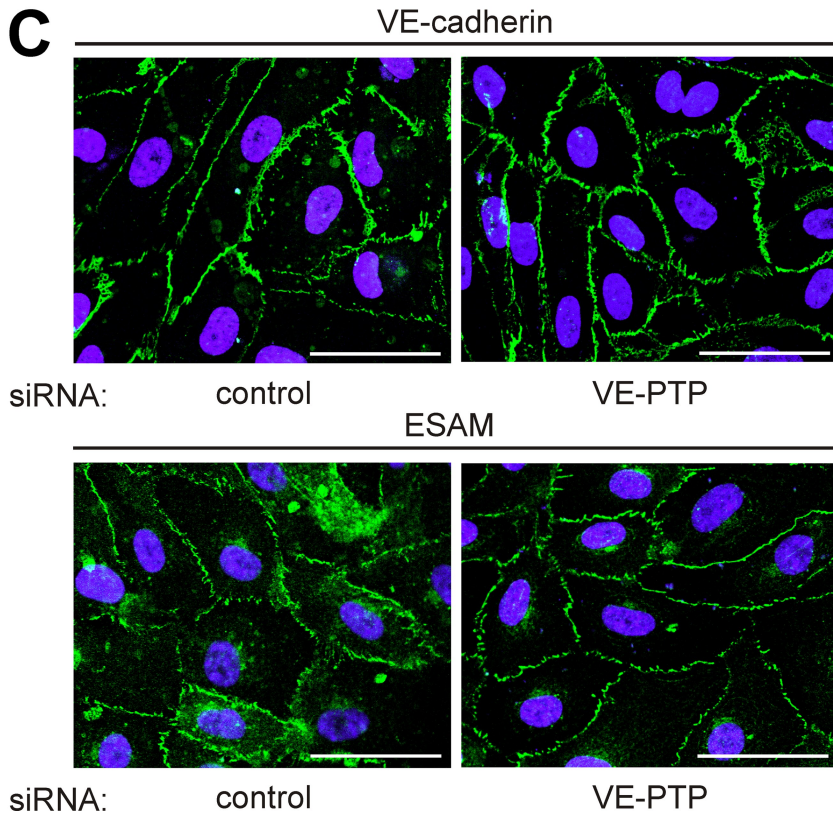

**Figure S1.** Distribution and expression of various endothelial cell contact proteins are unaffected by VE-PTP silencing. (A) Immunofluorescence staining of mouse endothelioma cells 24 h after transfection either with control siRNAs or with siRNAs directed against mouse VE-PTP. Cells were stained for VE-cadherin, ESAM, PECAM-1, or JAM-A. Bars, 10  $\mu$ m. (B) Cell lysates from mouse endothelioma shown in A were immunoblotted with pAbs against mouse VE-PTP. Equal loading was controlled by blotting for tubulin. Molecular weights are shown. (C) HUVECs, 24 h after transfection either with control siRNAs or with siRNAs directed against human VE-PTP and cultured on coverslips, were stained for VE-cadherin and ESAM. Visualization was done by confocal laser scanning microscopy. Bars, 50  $\mu$ m.
